# Supplementary material for: A simple and general approach to control the activity of DNA processing enzymes
Source: bioRxiv or medRxiv preprint supplement (doi:10.1101/2021.11.08.467724), 2021-11-08
Supplement: Supplementary file [file media-1.pdf]

## Supporting Information

| Oligonucleotide                      | DNA polymerase-Oligo                               |
|--------------------------------------|----------------------------------------------------|
| ttcctctaccacatca*c- <b>DBCO</b>      | Phi29 pol-PC_oligo/ Pfu pol-PC_oligo/Stul_PC_oligo |
| <b>DBCO</b> -t*tcctctaccacatcac      | Taq pol-PC_oligo                                   |
| cttcatcacaactccatctcc*a- <b>DBCO</b> | Phi29 pol-PC_oligoScr                              |
| gcattacgtttggaggacc*t- <b>DBCO</b>   | Phi29 pol-PC_oligo2                                |
| ttcctctaccacatcac- <b>DBCO</b>       | Phi29 pol-oligo                                    |

**Table S1. Sequence for the DBCO modified oligonucleotides.** The asterisk (\*) indicates the position of the photocleavable linker.

|                  | N° cycles | Denaturing    | Annealing     | Extension         |
|------------------|-----------|---------------|---------------|-------------------|
| Cyclophilin A    | 36        | 15 s at 95 °C | 20 s at 50 °C | 30s at 72 °C      |
| Bir A gene (Pfu) | 39        | 15 s at 95 °C | 20 s at 56 °C | 1min:30s at 72 °C |
| Bir A gene (Taq) | 39        | 15 s at 95 °C | 20 s at 63 °C | 1min:30s at 72 °C |
| Bir A fragment   | 39        | 15 s at 95 °C | 20 s at 59 °C | 30s at 72 °C      |

**Table S2. Cycling parameters used for PCR experiments.** All PCR experiments start with an initial denaturing step (5 min, 95 °C), followed by the cycling loop, and a final 10 min elongation step at 72 °C. The different cycling parameters are summarized in this table and the primers in table S3.

|                | Forward Primer                    | Reverse Primer                   |
|----------------|-----------------------------------|----------------------------------|
| Cyclophilin A  | TTCGCCATGGTTAACCCGACCGTTTTCTTCG   | GAAGCTCGAGCTGACCGCAGTCCGCGATGG   |
| Bir A gene     | TCTACCATGGGCAAGGATAACACCGTGCCACTG | ATTAGCTCGAGTTTTTCTGCACTACGCAGGGA |
| Bir A fragment | AGAGTGTCGTTAATCAGGG               | GCTCAAGTAATAAAGCCC               |

**Table S3. Primers used for PCR**

| ssDNA name                 | sequence                                           |
|----------------------------|----------------------------------------------------|
| FAM exo 3' activity ssDNA  | <b>FAM</b> -tctctctctctctctctctctatattccgtacttc    |
| FAM exo 3' reverse         | <b>FAM</b> - gaagtacggaatataggaagaggagag           |
| Exo 3' mismatch forward    | tctctctctaatcgctcttctctatattccgtacttc              |
| Exo 5' taq 4pb gap         | ggatgagataggatgaagtacgg                            |
| Exo 5' taq template        | tctctctctaatcgctcttctctatattccgtacttcatctatctcatcc |
| Exo 5' taq fork FAM        | ttacttctaggaagagcgattagagagaga- <b>FAM</b>         |
| FAM Stul BMN-Q535 quencher | <b>FAM</b> -ttcaggcctttt- Q535                     |
| Stul reverse               | aaaaggcctgaa                                       |

**Table S4. Oligonucleotides used in the nuclease activity experiments.** **FAM** stands for 6-carboxyfluorescein.

## Protein sequences

The position of the 4-Azido-L-phenylalanine incorporation is highlighted.

### *Phi29 pol*

MPRKMYSCDFETTTKVEDCRVWAYGYMNIEDHSEYKIGNSLDEFMAWVLKVQADLYFHdLkFDGAFIINWLERNGFKWSA  
DGLPNTYNTIISRMGQWYIMIDICLGKYGKRKIHTVIYDSLKLLPFVVKKIADKDFKLTVLKGDIDYHKERPVGKITYTPEEY  
AYIKNDIQIIAEALLIQFKQGLDRMTAGSDSLKGFKDIITTKKFKVFPPTLSLGLDKEVRYAYRGGFTWLNDRFKEKEIG  
EGMVFDVNSLYPAQMYSRLLPYGEPVFEKGYVWDEYPLHIQHIRCEFEELKEGYIPTIQIKRSRFYKGFNEYLKSSGGEI  
ADLWLSNVDLELMKEHYDLNVEYISGLKFKATTGLFKDFIDKWTYIKTTSEGAIKQLAKLMLNSLYGKFASNPVDTGKV  
PYLKENGALGFRLGEEETKDPVYTPMGVFITAWARYTTITAAQACYDRIIYCDTDSIHLTGTEIPDVIKDIVDPKPLGYW  
AHESFTFKRAKYLRQKTYIQDIYMKEVDGKLVGSPDDYTDIKFSVKAGMTDKIKKEVTFENFKVGFSRKMKPKPVQVPG  
GVVLVDDTFTIKSGazFGSLEHHHHHH

### *Taq pol*

MGRGMLPLFEPKGRVLLVDGHHLAYRTFHALKGLTTSRGEVQAVYGFAKSLLKALKEDGDAVIVVFDKAPSRHEAYGGYKAGR  
APTPEDFPRQLALIKELVDLLGLARLEVPGYEADDVLAASLAKKAEKEGYEVRIILTADKDLYQLLSDRIHVLHPEGYLITPAWLWEK  
YGLRPDQWADYRALTGDESDNLPVKGIGEKTKARKLLEEWGSLEALLKNDRLKPAIREKILAHMDDLKLSWDLAKVRTDLPLEVD  
FAKRRPDRERLRAFLELEFGSLLHEFGLLESKPALEEAPWPPPEGAFVGFVLSRKEPMWADLLALAAARGGRVHRAPEPYKALR  
DLKEARGLLAKDLSVLALREGLGLPPGDDPMLLAYLLDPSNTTPEGVARRYGGEWTEEAGERAALSERLFANLWGRLEGEERLLWL  
YREVERPLSAVLAHMEATGVRLDVAYLRLALSLEVAEEIARLEAEVFRLAGHPFNLSRDQLERVLFDLGLPAIGKTEKTGKRSTS  
AAVLEALREAHPIVEKILQYRELTKLKSTYIDPLPDLIHPRTGRLHTRFNQTATATGRLSSSDPNLQNI PVRTPLGQRIRRAFIAE  
EGWLLVALDYSQIELRVLAHLSGDNELIRVFQEGRDIHTETASWMFGVPREAVDPLMRRAAKTINFGVLYGMSAHRLSQELAIPEY  
EAQAFIERFYQSFPKVRAWIEKTELEGRRRRGYVETLFGRRRYVPDLEARVKSVERAAERMAFNMPVQGTAAADLMKLAMVKLFPRL  
EMGARMLLQVHDELVLLEAPKERAEAVARLAKEVMGCVYPLAVPLEVEVIGEDWLSAKESGazFGSLEHHHHHH

### *Pfu pol*

MGILDVDYITEEGKPIVIRLFKKENGKFKIEHDRTFRPYIYALLRDDSKEIEVKKITGERHGKIVRIVDVEKVEKFLGKPIITVWKL  
YLEHPQDVPTIREKVREHFAVVDIFEYDIPFAKRYLIDKGLIPMEGEEELKILAFDIETLYHEGEEFGKGPIMISYADENEAKVI  
TWKNIDLPHYVEVSSEREMIKRFLRIIREKDPDIIVTYNGDSDFPYLAKRAEKLGIKLTIGRDGSEPKMQRIGDMTAVEVKGRIH  
FDLYHVITRTINLPTYTLEAVYEAFGKPKKVKYADEIAKAWESGENLERVAKYSMEDAKATYELGKEFLPMEIQLSRLVQPLWD  
VSRSTGNLVEWFLLRKAYERNEVAPNKPSEEEYQRRRESYTGGFVKEPEKGLWENIVYLDLFRALYPSIIITHNVSPDTLNLEGC  
KNYDIAPQVGHKFKCKDIPGFIPSLGLHLEERQKIKTKMKETQDPIEKILLDYRQKAIKLLANSFYGYGYAKARWYCKECAESVT  
AWGRKYIELVWKELEKFGFKVLYIDTDGLYATIPGGESEEIKKKALEFVKYINSKLPGLLELEYEGFYKRGFFVTKKRYAVIDEE  
GKVI TRGLEIVRRDWEI AKETQARVLETILKHGDVEEAVRIVKEVIQKLANYEIPEEKLAIEYEQITRPLHEYKAI GPHVAVAKKL  
AAKGVKIKPGMVIGYIVLRGDGPI SNRAILAAEYDPKHKHYDAEYIENQVLPVLRILEGFGYRKEDLRYQKTRQVGLT SWLNIK  
KSSGazFGSLEHHHHHH

### *StuI*

MGSVSAVEQVFLECEERARADGDLIQRVSASDKEYHFQNWVQARIEACRLSYDDPGRNTYPDFRLIHHPEGYEVKGLFPPGREADYD  
SNSQVPTGNHGGREVFYVFGRYPKAERGVDEYPVVDLVVCHGSFLNADSEYVHKNKSFRGFGSYGDILVRDRKMYVVPTPFALASG  
TAGLATLIVPTEFEFQSDTLVQVGELDRTEVDEIVSYEFNLQTNEMVTHKAPNLNAGKVHVSFRAYRSRGADSKPVSLAGRLSG  
azFGSLEHHHHHH

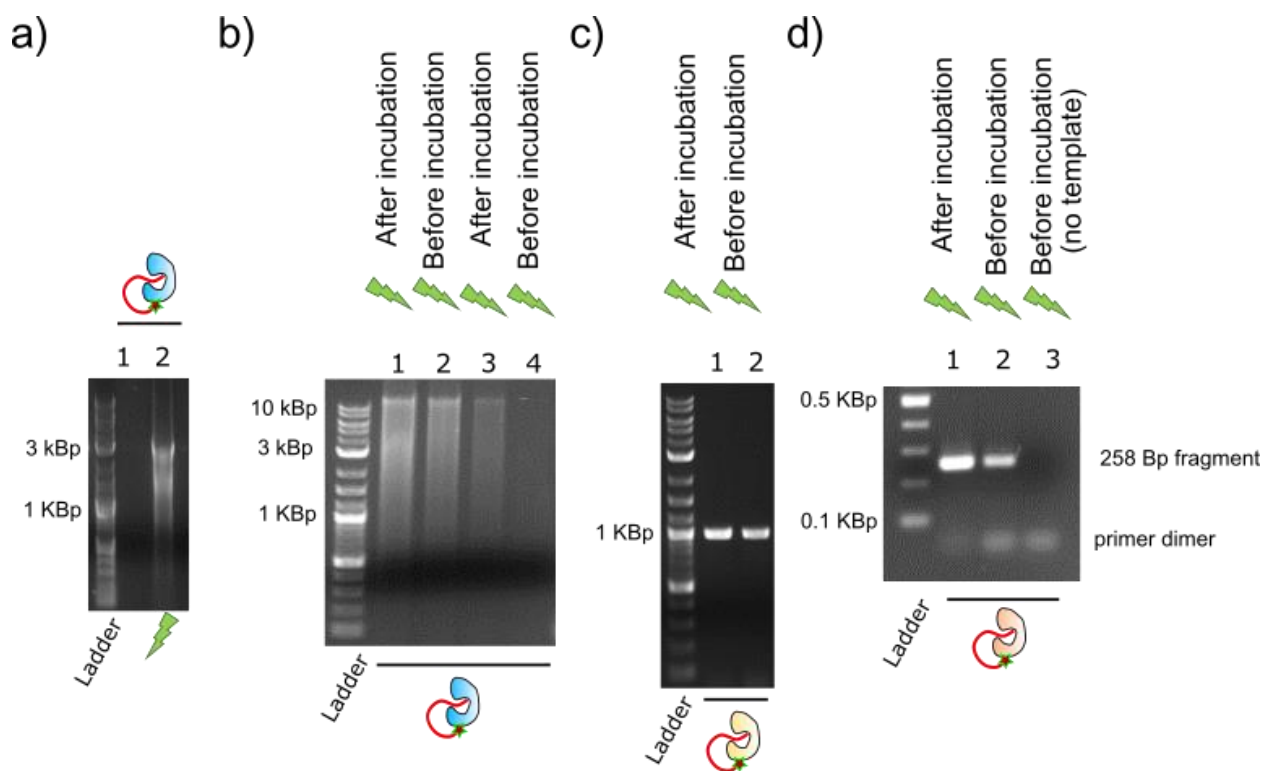

**Figure S1.- Tight-blockage of DNA polymerases and further failure-by-design assays.** **a)** Tight blockage of the activity of Phi pol-PC\_oligo. No amplification product was observed when 120 nM of Phi29 pol-PC\_oligo was used (lane 1). Activity was recovered after a 10 s light pulse with 315 nm UV (lane 2). **b), c),** and **d)** Independent failure-by-design experiments were performed to corroborate the results shown in Figure 5. **b)** Whole genome amplification by Phi pol-PC\_oligo. The hexamers concentration in reactions in lane 1 and 2 was 6.25  $\mu$ M, and 3.12  $\mu$ M in lane 3 and 4. **c)** Light-start PCR amplification of Bir A gene with Pfu pol-PC\_oligo. 10 nM of enzyme was used and 1  $\mu$ l of the diluted *E. coli* chromosomal DNA sample. **d)** Ligth-Start with Taq pol-PC\_oligo. The same conditions as in Figure 5c were used in this case.

**Figure S2 Fidelity of Taq pol-PC\_oligo and Pfu pol-PC\_oligo enzymes.** In order to rule out a significant effect on the fidelity of the amplification reaction, we sequenced PCR products amplified by the oligo-modified enzymes. The Bir A gene from *E. coli* (GenBank: M15820.1) was PCR amplified, gel-purified and sent to sequencing (Eurofins Genomics, Germany). The gene was amplified using unmodified Taq pol, unmodified Pfu pol, Tap pol-PC\_oligo and Pfu pol-PC\_oligo, and the sequences obtained by the unmodified and oligo-modified versions compared (a pulse of 120 s 365 nm UV light was used for the activated enzymes). The first 50 and last 100-200 nucleotides of the sequencing reaction were omitted due to limitations of the sequencing reaction. In none of both cases, differences between the sequences retrieved by the unmodified enzymes and the oligo-modified ones were detected (see sequence alignment below). Furthermore, the sequences show 100% identity with the Bir A deposited sequence (GenBank: M15820.1). Altogether, the results are consistent with a conserved fidelity of the light-activated reactions.

**Pfu pol vs Pfu pol-PC\_oligo**

Alignment of Sequence\_1: [SeqBirA\_Pfu.txt.xdna] with Sequence\_2: [SeqBirA\_Pfu\_light.txt.xdna]

Similarity : 849/849 (100.00 %)

|       |     |                                                               |     |
|-------|-----|---------------------------------------------------------------|-----|
| Seq_1 | 1   | AAGCCCCCTGTTTGTCTATTCGCGTGAAATGCCAAATATTTCTTTATCACCAATGATAA   | 60  |
|       |     |                                                               |     |
| Seq_2 | 1   | AAGCCCCCTGTTTGTCTATTCGCGTGAAATGCCAAATATTTCTTTATCACCAATGATAA   | 60  |
| Seq_1 | 61  | GTTTCACTGGGCGATTAATAAAAATTATCCAGCTTTTCCCAGCGCGACAGATAAGGTGCCA | 120 |
|       |     |                                                               |     |
| Seq_2 | 61  | GTTTCACTGGGCGATTAATAAAAATTATCCAGCTTTTCCCAGCGCGACAGATAAGGTGCCA | 120 |
| Seq_1 | 121 | ATCCTTCTTGTTTGAAGAGTTCCAACGCAGCACGTAATTCACGTATTAGCATGGCCGCCA  | 180 |
|       |     |                                                               |     |
| Seq_2 | 121 | ATCCTTCTTGTTTGAAGAGTTCCAACGCAGCACGTAATTCACGTATTAGCATGGCCGCCA  | 180 |
| Seq_1 | 181 | ACGTATTACGATCGAGATTGATCCCCGCTTCCTGCAGCGTGATCCACCCCTGATTAACGA  | 240 |
|       |     |                                                               |     |
| Seq_2 | 181 | ACGTATTACGATCGAGATTGATCCCCGCTTCCTGCAGCGTGATCCACCCCTGATTAACGA  | 240 |
| Seq_1 | 241 | CACTCTCTTCAACACGGCGCATTGCCATGTTGATCCCGCTCCAATGACTATTTGCGCCG   | 300 |
|       |     |                                                               |     |
| Seq_2 | 241 | CACTCTCTTCAACACGGCGCATTGCCATGTTGATCCCGCTCCAATGACTATTTGCGCCG   | 300 |
| Seq_1 | 301 | CATCGCCAGTTTTGCCAGTCAGCTCCACCAGAATGCCTGCCAGCTTGCGATCCTGCAGAT  | 360 |
|       |     |                                                               |     |
| Seq_2 | 301 | CATCGCCAGTTTTGCCAGTCAGCTCCACCAGAATGCCTGCCAGCTTGCGATCCTGCAGAT  | 360 |
| Seq_1 | 361 | AGAGGTCATTAGGCCATTTAACACGAACTTTATCTGCACCCAGCTTGCCTAATACTTCCG  | 420 |
|       |     |                                                               |     |
| Seq_2 | 361 | AGAGGTCATTAGGCCATTTAACACGAACTTTATCTGCACCCAGCTTGCCTAATACTTCCG  | 420 |
| Seq_1 | 421 | CCATCACGATACCGATAACCAGACTTAAACCAATCGCCGCCGCGGGCCTTGTTCAGAC    | 480 |



|       |     |                                                               |     |
|-------|-----|---------------------------------------------------------------|-----|
| Seq_2 | 181 | ACGTATTACGATCGAGATTGATCCCCGCTTCCTGCAGCGTGATCCACCCCTGATTAACGA  | 240 |
| Seq_1 | 241 | CACTCTCTTCAACACGGCGCATTGCCATGTTGATCCCGGCTCCAATGACTATTTGCGCCG  | 300 |
|       |     |                                                               |     |
| Seq_2 | 241 | CACTCTCTTCAACACGGCGCATTGCCATGTTGATCCCGGCTCCAATGACTATTTGCGCCG  | 300 |
| Seq_1 | 301 | CATCGCCAGTTTTGCCAGTCAGCTCCACCAGAATGCCTGCCAGCTTGCGATCCTGCAGAT  | 360 |
|       |     |                                                               |     |
| Seq_2 | 301 | CATCGCCAGTTTTGCCAGTCAGCTCCACCAGAATGCCTGCCAGCTTGCGATCCTGCAGAT  | 360 |
| Seq_1 | 361 | AGAGGTCATTAGGCCATTTAACACGAACTTTATCTGCACCCAGCTTGCGTAATACTTCCG  | 420 |
|       |     |                                                               |     |
| Seq_2 | 361 | AGAGGTCATTAGGCCATTTAACACGAACTTTATCTGCACCCAGCTTGCGTAATACTTCCG  | 420 |
| Seq_1 | 421 | CCATCACGATACCGATAACCAGACTTAAACCAATCGCCGCCGCCGGGCCTTGTTCCAGAC  | 480 |
|       |     |                                                               |     |
| Seq_2 | 421 | CCATCACGATACCGATAACCAGACTTAAACCAATCGCCGCCGCCGGGCCTTGTTCCAGAC  | 480 |
| Seq_1 | 481 | GCCAGAACATCGACAAATATAAGTTTGCGCCAAAAGGCGAAAACCATTTCCGACCCCGGC  | 540 |
|       |     |                                                               |     |
| Seq_2 | 481 | GCCAGAACATCGACAAATATAAGTTTGCGCCAAAAGGCGAAAACCATTTCCGACCCCGGC  | 540 |
| Seq_1 | 541 | GACCACGGCCAGCCTGCTGGTATTCTGCAATGCAAGCATCGCCCGATTTAAGCTCTCCGA  | 600 |
|       |     |                                                               |     |
| Seq_2 | 541 | GACCACGGCCAGCCTGCTGGTATTCTGCAATGCAAGCATCGCCCGATTTAAGCTCTCCGA  | 600 |
| Seq_1 | 601 | TACGATCAAGAAGGTACTGATTTCGTGGAGTCAATCACTGGCAGCACGGCTACACTACCGC | 660 |
|       |     |                                                               |     |
| Seq_2 | 601 | TACGATCAAGAAGGTACTGATTTCGTGGAGTCAATCACTGGCAGCACGGCTACACTACCGC | 660 |
| Seq_1 | 661 | CATCCAGCTGACCCAATATCTGTTTAGCATTAAAGTAACTGGATAGGCTCAGGCAGGCTGT | 720 |
|       |     |                                                               |     |
| Seq_2 | 661 | CATCCAGCTGACCCAATATCTGTTTAGCATTAAAGTAACTGGATAGGCTCAGGCAGGCTGT | 720 |
| Seq_1 | 721 | ATCCTTTACCCGGAACGGTAAAGACATCAA                                | 750 |
|       |     |                                                               |     |
| Seq_2 | 721 | ATCCTTTACCCGGAACGGTAAAGACATCAA                                | 750 |

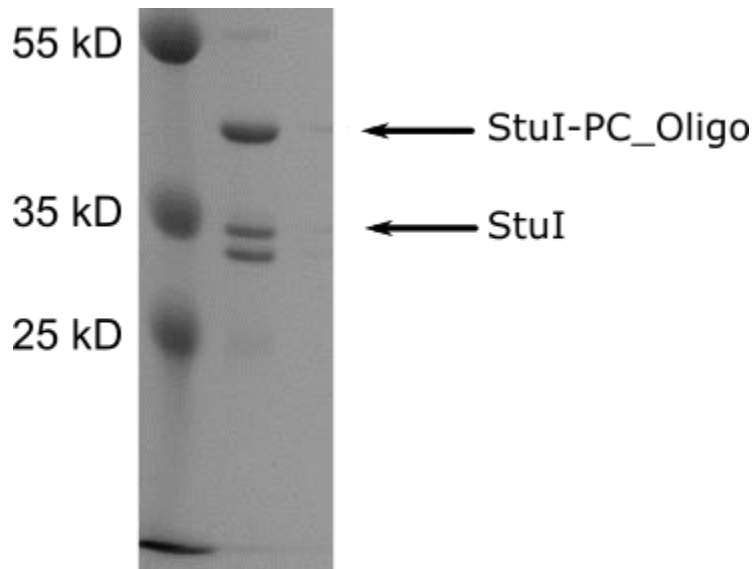

**Figure S3. Sample purity of the Stul-PC\_Oligo sample.** SDS-PAGE gel of Stul-PC\_oligo sample. Unmodified Stul enzyme was always co-eluted with the Stul-PC\_Oligo species. Furthermore, a contaminant of lower molecular weight than Stul co-eluted as well with the enzyme during the previous purification steps. We assigned this contamination to a partially degraded form of the enzyme, as it always co-eluted with the protein after different chromatographic steps (including Nickel affinity purification, cationic exchange, anionic exchange and hydrophobic interaction chromatography). We interpreted the consistent co-elution of the different species to the formation of oligomers, which is consistent with the oligomeric nature of type II restriction enzymes.
